1 **Chromosome-level genome assembly of the African pike,**

2 *Hepsetus odoe*

3

4 Xiao Du<sup>1,2,3,\*</sup>, Xiaoning Hong<sup>1,2,3,4,\*</sup>, Guangyi Fan<sup>1,2,3,\*</sup>, Xiaoyun Huang<sup>1,2,3</sup>, Shuai  
5 Sun<sup>1,2,3</sup>, Ouyang Bingjie<sup>1,2,3</sup>, He Zhang<sup>1,2,3</sup>, Mengqi Zhang<sup>1,2,3</sup>, Shanshan Liu<sup>1,2,3</sup>, Xin  
6 Liu<sup>1,2,3,#</sup> & Wenwei Zhang<sup>2,#</sup>

7

8 <sup>1</sup> BGI-Qingdao, BGI-Shenzhen, Qingdao, 266555, China

9 <sup>2</sup> BGI-Shenzhen, Shenzhen, 518083, China

10 <sup>3</sup> China National GeneBank, BGI-Shenzhen, Shenzhen, 518120, China

11 <sup>4</sup> BGI Education Center, University of Chinese Academy of Sciences, Shenzhen, 236009,  
12 China

13 \* These authors contributed equally: Xiao Du, Xiaoning Hong, and Guangyi Fan

14

15

16 # Correspondence authors: Xin Liu ([liuxin@genomics.cn](mailto:liuxin@genomics.cn)); Wenwei Zhang  
17 ([zhangww@genomics.cn](mailto:zhangww@genomics.cn))

## 18 **Abstract**

19 The order Characiformes is one of the largest components of the freshwater teleost fauna  
20 inhabiting exclusively in South America and Africa with great ecological and economical  
21 significance. Yet, quite limited genomic resources are available to study this group and  
22 their transatlantic vicariance. In this study we present a chromosome-level genome  
23 assembly of the African pike (*Hepsetus odoe*), a representative member of the African  
24 Characiformes. To this end, we generated 119, 11, and 67 Gb reads using the single tube  
25 long fragment read (stLFR), Oxford Nanopore, and Hi-C sequencing technologies,  
26 respectively. We obtained an 862.1 Mb genome assembly with the contig and scaffold  
27 N50 of 347.4 kb and 25.8 Mb, respectively. Hi-C sequencing produced 29 chromosomes  
28 with 742.5 Mb, representing 86.1% of the genome. 24,314 protein-coding genes were  
29 predicted and 23,999 (98.7%) genes were functionally annotated. The chromosomal-scale  
30 genome assembly will be useful for functional and evolutionary studies of the African  
31 pike and promote the study of Characiformes speciation and evolution.

32

33

## 34 **Background & Summary**

35 The order Characiformes is one of the largest components of the freshwater fish fauna  
36 worldwide, comprising about 2,000 ecologically and morphologically diverse fish living  
37 in rivers and lakes exclusively in Africa and South America. Characiformes are  
38 ecologically important by playing crucial roles in energy flux and material cycling in  
39 river systems<sup>1</sup>. Moreover, they have great significance for local economy because of diet  
40 component of livestock and humans<sup>2</sup>. As Characiformes are exclusively freshwater fishes,  
41 their transatlantic distribution was proposed ascribed to the split of South America and  
42 Africa in the Early Cretaceous fragmentation of western Gondwana<sup>3</sup>. This distribution  
43 across the Atlantic Ocean displays asymmetry in the number of species, with *circa* 220  
44 reported species in Africa and over 1,700 species in South America. High fragmentation  
45 has been reported in the South American species, compared to the lower fragmentation  
46 and variability in African ones<sup>4,5</sup>. However, quite limited genomic information has been  
47 available to study the Characiformes vicariance. Despite the large amount and high  
48 diversity of species, presently only three genomes from two families *Characidae*

49 (*Astyanax mexicanus*) and *Serrasalminae* (*Pygocentrus nattereri*, *Colossoma*  
50 *macropomum*) have been released in Characiformes, which all belong to the South  
51 American lineages. No genomes of African Characiformes have been reported. Genomic  
52 studies of African Characiformes would highly promote the understanding of  
53 Characiformes evolution and speciation during the continent fragmentation.  
54  
55 African pike, *Hepsetus odoe*, is a representative African Characiformes that belongs to  
56 the family *Hepsetidae*. It is a torpedo-shaped predatory and piscivorous species  
57 distributed in the freshwater basins in central and western Africa<sup>6</sup>, bearing a striking  
58 resemblance to the European pike. One of the most striking features is their dentition  
59 with the lower jaw filled with two rows of sharp point teeth while the upper with only  
60 one row. Due to roles in freshwater food chain and diet component of livestock and  
61 humans, *H. odoe* are biologically and economically important<sup>2</sup>. *H. odoe* was reported the  
62 only species in the *Hepsetidae* family, until recently five additional species were  
63 described by recent studies<sup>6,7</sup>. Despite of the high economic and evolutionary importance,  
64 no genome data are available for this group.  
65  
66 A high-quality genome assembly of the African pike will highly facilitate the study of its  
67 functional and evolutionary genomics, which also will promote the understanding of other  
68 African Characiformes along with their divergence from the South American  
69 Characiformes. Therefore, in this study we report a chromosome-scale genome assembly  
70 of *H. odoe* using single tube long fragment read (stLFR)<sup>8</sup>, Oxford Nanopore, and Hi-C  
71 technologies (Additional file 1: Fig. S1). We obtained a genome assembly of 862.1 Mb  
72 with the contig and scaffold N50 of 347.4 kb and 25.8 Mb, respectively. With  
73 chromosome-level scaffolding, 29 scaffolds were constructed corresponding to 29  
74 chromosomes with a total length of 742.5 Mb, representing 86.1% of all genome  
75 sequences. 24,314 protein-coding genes were predicted in the assembly, and 98.7% of  
76 them were functionally annotated. The chromosomal-level genome assembled here will  
77 be useful for functional and evolutionary research of the African pike. It is the first  
78 genome assembly in the African Characiformes and will promote the understanding of  
79 Characiformes speciation and evolution.

80

## 81 **Methods**

### 82 **Sampling and sequencing**

83 Long genomic DNA (gDNA) from muscle tissue of a male African pike was isolated  
84 using a conventional approach for sufficient DNA quality<sup>9</sup>. DNA integrity was checked  
85 using agarose gel electrophoresis. The sequencing libraries were constructed via stLFR  
86 technology according to the standard protocol via the MGIEasy stLFR library preparation  
87 kit (PN:1000005622)<sup>10</sup> and were sequenced on BGISEQ-500 platform. To overcome the  
88 gaps (long ambiguous sequences) induced by repeats, library preparation and sequencing  
89 were performed on the MinION nanopore sequencer (Oxford Nanopore Technologies,  
90 Oxford, UK) for generating long reads, following the base protocols of Oxford Nanopore.  
91 To get a high-resolution genome contact map, we used *in situ* Hi-C according to the  
92 protocol of previous study with some modifications<sup>11</sup>. The restriction endonuclease MboI  
93 was used to digest DNA, followed by biotinylated residue labeling. The Hi-C library was  
94 sequenced on BGISEQ-500 platform with 100 bp pair-end sequencing.

95

### 96 **Ethics statement**

97 The adult male African pike was purchased from the fish and aquarium market in  
98 Guangzhou, Guangdong Province, China in May 2018. The experimental procedures  
99 followed the guidelines approved by the institutional review board on bioethics and  
100 biosafety of BGI (IRB-BGI). The experiment was authorized by the IRB-BGI (under NO.  
101 FT17007). The review procedures in IRB-BGI meet good clinical practice (GCP)  
102 principles.

103

### 104 **De novo assembly, and chromosome construction**

105 The k-mer frequency distribution analysis<sup>12</sup> was used to estimate the African pike  
106 genome size. According to the 17-mer analysis, the genome size of African pike was  
107 estimated to be 995 Mb (Table 2; Additional file 1: Fig. S2).

108

109 We obtained 118.6 Gb (~141X; Table 1) raw sequencing reads from stLFR. We used  
110 SOAPfilter v.2.2, a package in SOAPdenovo2<sup>13</sup> to filter reads with low quality reads (>

111 40% low-quality bases,  $Q < 7$ ), PCR duplication, or adapter contamination. After filtering,  
112 60.4 Gb (~72X; Table 1) clean reads were obtained for genome assembly. Supernova  
113 assembler v2.0.1 (10X Genomics, Pleasanton, CA) was used to build contigs and  
114 scaffolds, and gaps were closed by GapCloser (v1.2)<sup>13</sup>. With stLFR data, the generated  
115 African pike assembly was 859.2 Mb. The contig and scaffold N50 were 43.9 kb and 5.1  
116 Mb, respectively (Table 3). On basis of that, we generated a total of 11.0 Gb (~13X;  
117 Table 1) long reads on the MinION nanopore sequencer to further fill the gaps using  
118 TGSGapFiller<sup>14</sup> with default parameters. After gap filling, the contig length was highly  
119 elevated with contig N50 of 352.1 kb (Table 3).

120

121 Reads from Hi-C library<sup>15</sup> were used to generate a chromosomal-level genome assembly.  
122 First, we obtained 65.8 Gb (~76X, Table 1) clean sequencing data from the Hi-C library  
123 by removing reads containing more than 1% unidentified (N) bases and low-quality bases  
124 (quality value  $< 10$ ) using SOAPnuke (v1.5.4)<sup>16</sup> with parameters “-l 10 -q 0.1 -n 0.01 -Q  
125 2”. Next, we used HiC-Pro pipeline (v2.8.0)<sup>17</sup> for quality control to generate valid reads.  
126 Of all 658,260,000 raw pair-end reads, there were 22.78% valid (149,912,370) paired Hi-  
127 C reads suitable for following analysis. We used Juicer (v.1.5)<sup>18</sup>, an open-source and  
128 fully-automated pipeline for pretreatment of Hi-C datasets, for analyzing valid Hi-C  
129 datasets and producing the alignment result. Lastly, we applied 3D-DNA workflow (3D  
130 *de novo* assembly, v.170123)<sup>19</sup> to create the ordered-and-oriented genome sequences in  
131 chromosome level with the main parameter “-m haploid -s 4 -c 29”. We assembled 29  
132 chromosomes of *H. odoe* ranging from 8.03 Mb to 34.85 Mb with the total length of  
133 742.5 Mb (Table 4; Fig. 1), which possessed 86.1% of all genome sequences. The final  
134 African pike genome assembly spanned 862.1 Mb and 29 chromosomes, accounting for  
135 86.6 % of the estimated genome size, with contig and scaffold N50 of 347.4 kb and 25.8  
136 Mb, respectively. The constructed 29 chromosomes agreed with the previous karyotype  
137 analysis of *H. odoe*<sup>6</sup>.

138

### 139 **Gene prediction and functional annotation**

140 To facilitate gene prediction in the genome, repetitive elements were identified first. Two  
141 methods (*de novo* and homology-based predictions) were performed in the repeat

142 annotation of the African pike genome. In the *de novo* method, a *de novo* library was  
143 built via running RepeatModeler (v1.0.8)<sup>20</sup> and LTR-FINDER (v1.0.6)<sup>21</sup>, and the  
144 predicted model was applied to identify interspersed repetitive elements by  
145 RepeatMasker (v4.0.5). In the homology-based prediction, detection of interspersed  
146 repeats was realized by aligning the genome against the Repbase database<sup>22</sup> at DNA and  
147 protein levels using RepeatMasker and RepeatProteinMask (v4.0.5)<sup>23</sup>. Tandem repeats  
148 were predicted by TRF (v4.07). By integrating results of above approaches, 317.3 Mb  
149 repetitive sequences were predicted, representing 36.7% of the genome assembly (Table  
150 5). Finally, 284.1 Mb TEs were identified, accounting for 32.9% of the genome assembly.  
151 The repetitive element annotations were summarized in Table 6. Those repetitive  
152 sequences were masked to reduce the interference for the following gene predictions.  
153  
154 Next, we conducted structural and functional annotation for the assembled genome. For  
155 structural annotation, both homology-based and *de novo* prediction approaches were  
156 applied. In *de novo* prediction, AUGUSTUS (v3.1)<sup>24</sup> and GENSCAN (v2009)<sup>25</sup> were  
157 utilized to predict the gene model with zebrafish data as a training set, and 23,163 and  
158 29,084 protein-coding genes were predicted, respectively (Table 7). The homology-based  
159 prediction of genome assembly was realized by referring to the NCBI protein repertoires  
160 of six homologous species including Mexican tetra (*Astyanax mexicanus*), red-bellied  
161 piranha (*Pygocentrus nattereri*), channel catfish (*Ictalurus punctatus*), common carp  
162 (*Cyprinus carpio*), iridescent shark (*Pangasianodon hypophthalmus*), and zebrafish  
163 (*Danio rerio*). After mapping the protein sequences to the repeat-masked African pike  
164 genome using BLAST<sup>26</sup> (*E*-value cutoff of  $1 \times 10^{-5}$ ), GeneWise (v2.4.1)<sup>27</sup> was used to  
165 predict gene models by aligning homologous genome sequences against the matched  
166 proteins. Lastly, we performed GLEAN to integrate all above gene models and obtained a  
167 non-redundant gene set consisting of 24,314 protein-coding genes (Table 7). There were  
168 9.77 exons per gene and the average length of coding sequences (CDS) was 1,712 bp  
169 (Table 7). Gene function was annotated with TrEMBL<sup>28</sup>, Swissprot<sup>28</sup>, InterPro<sup>29</sup>, Gene  
170 Ontology<sup>30</sup>, and Kyoto Encyclopedia of Genes and Genomes (KEGG)<sup>31</sup> databases.  
171 Ultimately, 23,999 genes (98.7% of the total) in African pike were functionally annotated  
172 (Table 8).

173

#### 174 **Genome features of the African pike**

175 CpG islands (CGIs), which are a significant group of CpG dinucleotide repeats in  
176 genome regions, are functionally important for genomic studies. The CGIs were  
177 identified across the genome using CpGIScan<sup>32</sup>. Ultimately, 24,297 CGIs were identified  
178 with a total length of 15.5 Mb. A range of genome features including gene density, repeat  
179 content, GC content, and GGI content were summarized and depicted in Fig. 2a. The  
180 CpG density was found positively correlated with GC content, gene density, and repeat  
181 content (Fig. 2b), following a similar pattern observed in other published fish and  
182 mammals genomes<sup>33-35</sup>.

183

#### 184 **Gene family identification**

185 Gene family analysis among species provides significant insights into phylogenetic and  
186 evolutionary studies. The protein-coding genes from the African pike assembly, two  
187 sequenced species in order Characiformes (*A. mexicanus* and *P. nattereri*), and five other  
188 sequenced species including Atlantic salmon (*Salmo salar*), yellow catfish (*Tachysurus*  
189 *fulvidraco*), northern pike (*Esox lucius*), electric eel (*Electrophorus electricus*), and  
190 zebrafish (*Danio rerio*) were downloaded from NCBI database and analyzed. All-versus-  
191 all protein similarities were computed using BLASTP<sup>26</sup> and the alignment results were  
192 used by TreeFam (v4.0)<sup>36</sup> to deduce homologous gene sequences and identify gene  
193 families. Orthologue clustering analysis of predicted genes was conducted using MCL  
194 algorithm (Fig. 3a). Finally, we identified 9,661 gene families in the African pike genome  
195 (Additional file 1: Table S1). Compared to the two South American Characiformes (*A.*  
196 *mexicanus* and *P. nattereri*) and the zebrafish (*D. rerio*), 221 gene families were unique  
197 in African pike (Fig. 3b).

198

#### 199 **Phylogenetic analysis**

200 To study the evolutionary position of African pike, 3,106 single-copy genes from the  
201 above seven species were used for constructing phylogenetic tree and estimating  
202 divergence time. Protein sequences of single-copy gene families were aligned by  
203 MUSCLE (v3.8.31)<sup>37</sup> and then were concatenated into a supergene matrix for each



204 species. The alignment results were processed into PhyML (v 3.0)<sup>37,38</sup> to construct a ML  
205 phylogenetic tree. Divergence time was inferred using the MCMCTree from the PAML  
206 package<sup>39</sup>. Divergence times from TimeTree database<sup>40</sup> were applied for calibration,  
207 which include splits between *E. lucius* and *D. rerio* (198-211 Mya), between *D. rerio* and  
208 *T. fulvidraco* (170-183 Mya), and between *T. fulvidraco* and *E. electricus* (122-136 Mya).  
209 The phylogenetic tree showed that *H. odoe* was most closely related to *P. nattereri* with a  
210 divergence time around 73.8 Mya, and together the clade formed the sister group to *A.*  
211 *mexicanus* (Fig. 4a). The African family (*H. odoe*) was dispersed among the South  
212 American families (*P. nattereri* than *A. mexicanus*). Although sharing similar pike-like  
213 forms, the African pike was distantly related to the northern pike (*E. lucius*) with a  
214 divergence time around 205 Mya.

215

216

### 217 **Expansion and contraction of gene families**

218 Based on the gene family clustering results and divergence time estimation, we used Café  
219 (v2.1)<sup>41</sup> to estimate the gene family expansion and contraction events during speciation.  
220 Results showed that in African pike genome 769 gene families were found expanded and  
221 1,346 gene families were contracted (Fig. 4a). The 284 significantly expanded and 81  
222 significantly contracted gene families ( $p < 0.05$ ; Additional file 1: Table S2) in African  
223 pike were annotated with KEGG ortholog functions. Among that 93 (32.7%) gene  
224 families were strikingly expanded in immune system (Fig. 4b).

225

### 226 **Data Records**

227 The sequencing data and genome assembly of the African pike were deposited in NCBI  
228 under BioProject accession PRJNA625402. The datasets reported in this study are also  
229 available in the CNGB Nucleotide Sequence Archive (CNSA: <https://db.cngb.org/cnsa>;  
230 accession number CNP0001012).

231

### 232 **Technical Validation**

233 **Assessment of genome assembly**



234 The contig and scaffold N50 of the African pike genome were 347.4 kb and 25.8 Mb  
235 respectively, with the longest scaffold 34,852,849 bp. We assessed the quality of the  
236 assembled genome using the Benchmarking Universal Single-copy Orthologs (BUSCO  
237 v3.0.2)<sup>42</sup>. The assembly reached 90.7% ~92.4% completeness compared to single-copy  
238 ortholog gene sets from atinopterygii, metazoans, and vertebrates in BUSCOs (Table 9).  
239 This demonstrates the high completeness of our genome assembly.

240

241 Next, we evaluated the assembly of the twenty-nine chromosomes. The genome assembly  
242 was divided into 100kb bins. The signal for the interaction between any two bins was  
243 defined by the count of Hi-C reads covered by those bins, and the signal intensities were  
244 depicted in a heat map. The Hi-C heat map clearly split the bins into 29 blocks, and bins  
245 within the same chromosome showed substantially larger signal intensities than bins  
246 distributed on different chromosomes (Fig. 1). This demonstrates the high quality of the  
247 chromosome assembly.

248

#### 249 **Gene prediction and annotation validation**

250 Repetitive sequences in the assembly were masked before gene annotation. Gene model  
251 prediction in the African pike was realized by using a combination of *de novo* and  
252 homology-based approaches. Then the gene prediction results were integrated into a  
253 consensus gene set by GLEAN. Annotation completeness of the African pike gene set  
254 was assessed by BUSCO, reaching 92.5%~96.4% completeness (Table 9). In addition,  
255 functional annotation of the predicted genes showed that 98.7% of them could be  
256 assigned into at least one functional term (Table 8). These results clearly indicate the  
257 annotated gene set is quite complete.

258

#### 259 **Code Availability**

260 All commands used in the analysis were executed by following the manual of the  
261 corresponding bioinformatics tools. There were no any custom specific codes.

262

263 **Acknowledgements**

264 This work was supported by the special funding of “Blue granary” scientific and  
265 technological innovation of China (2018YFD0900301-05). We also thank for the  
266 technical supports from China National Genebank in stLFR library construction and  
267 sequencing.

268

269 **Author Contributions**

270 G. F., H. Z., and X. L. designed the study. G. F., X. L., and W. Z. supervised the study.  
271 M. Z. and S. L. contributed to sample collection and sequencing experiments. X. D., X.  
272 Hong, S. S., X. Huang and B.O. performed bioinformatics analyses. X. D., X. Hong, and  
273 G. F. wrote the manuscript.

274

275 **Competing interests**

276 The authors declare no competing interests.

## 277 **References**

- 278 1 Taylor, B. W., Flecker, A. S. & Hall, R. O., Jr. Loss of a harvested fish species  
279 disrupts carbon flow in a diverse tropical river. *Science* **313**, 833-836,  
280 doi:10.1126/science.1128223 (2006).
- 281 2 Ogunola, O. S., Onada, O. A. & Falaye, A. E. Preliminary evaluation of some  
282 aspects of the ecology (growth pattern, condition factor and reproductive biology)  
283 of African pike, *Hepsetus odoe* (Bloch 1794), in Lake Eleiyele, Ibadan, Nigeria.  
284 *Fisheries & Aquatic Science* **21**, 12.
- 285 3 Calcagnotto, D., Schaefer, S. A. & DeSalle, R. Relationships among characiform  
286 fishes inferred from analysis of nuclear and mitochondrial gene sequences.  
287 *Molecular phylogenetics and evolution* **36**, 135-153,  
288 doi:10.1016/j.ympev.2005.01.004 (2005).
- 289 4 Orti, G. & Meyer, A. The radiation of characiform fishes and the limits of  
290 resolution of mitochondrial ribosomal DNA sequences. *Syst Biol* **46**, 75-100,  
291 doi:10.1093/sysbio/46.1.75 (1997).
- 292 5 Carvalho, P. C. *et al.* First Chromosomal Analysis in Hepsetidae (Actinopterygii,  
293 Characiformes): Insights into Relationship between African and Neotropical Fish  
294 Groups. *Frontiers in genetics* **8**, doi:10.3389/fgene.2017.00203 (2017).
- 295 6 Carvalho, P. C. *et al.* First Chromosomal Analysis in Hepsetidae (Actinopterygii,  
296 Characiformes): Insights into Relationship between African and Neotropical Fish  
297 Groups. *Frontiers in genetics* **8**, 203, doi:10.3389/fgene.2017.00203 (2017).
- 298 7 Decru, E., Vreven, E. & Snoeks, J. A revision of the Lower Guinean *Hepsetus*  
299 species (Characiformes; Hepsetidae) with the description of *Hepsetus kingsleyae*  
300 sp. nov. *Journal of fish biology* **82**, 1351-1375, doi:10.1111/jfb.12079 (2013).
- 301 8 Wang, O. *et al.* Efficient and unique cobarcoding of second-generation  
302 sequencing reads from long DNA molecules enabling cost-effective and accurate  
303 sequencing, haplotyping, and de novo assembly. *Genome Research* **29**, 798-808,  
304 doi:10.1101/gr.245126.118 (2019).
- 305 9 Panova, M. *et al.* in *Marine genomics* (ed S. Bourlat) 13-44 (Humana Press,  
306 2016).

- 307 10 Wang, O. *et al.* Efficient and unique cobarcoding of second-generation  
308 sequencing reads from long DNA molecules enabling cost-effective and accurate  
309 sequencing, haplotyping, and de novo assembly. *Genome Res* **29**, 798-808,  
310 doi:10.1101/gr.245126.118 (2019).
- 311 11 Rao, S. S. *et al.* A 3D map of the human genome at kilobase resolution reveals  
312 principles of chromatin looping. *Cell* **159**, 1665-1680,  
313 doi:10.1016/j.cell.2014.11.021 (2014).
- 314 12 Li, R. *et al.* The sequence and de novo assembly of the giant panda genome.  
315 *Nature* **463**, 311-317, doi:10.1038/nature08696 (2010).
- 316 13 Luo, R. *et al.* SOAPdenovo2: an empirically improved memory-efficient short-  
317 read de novo assembler. *Gigascience* **1**, 18, doi:10.1186/2047-217X-1-18 (2012).
- 318 14 Guo, L. & Deng, L. 10.5281/zenodo.3446281 (2019).
- 319 15 Burton, J. N. *et al.* Chromosome-scale scaffolding of de novo genome assemblies  
320 based on chromatin interactions. *Nature Biotechnology* **31**, 1119-1125,  
321 doi:10.1038/nbt.2727 (2013).
- 322 16 Chen, Y. *et al.* SOAPnuke: a MapReduce acceleration-supported software for  
323 integrated quality control and preprocessing of high-throughput sequencing data.  
324 *Gigascience* **7**, gix120 (2017).
- 325 17 Servant, N. *et al.* HiC-Pro: an optimized and flexible pipeline for Hi-C data  
326 processing. *Genome Biology* **16**, 259, doi:10.1186/s13059-015-0831-x (2015).
- 327 18 Durand, N. C. *et al.* Juicer Provides a One-Click System for Analyzing Loop-  
328 Resolution Hi-C Experiments. *Cell systems* **3**, 95-98,  
329 doi:10.1016/j.cels.2016.07.002 (2016).
- 330 19 Dudchenko, O. *et al.* De novo assembly of the *Aedes aegypti* genome using Hi-C  
331 yields chromosome-length scaffolds. *Science* **356**, 92-95,  
332 doi:10.1126/science.aal3327 (2017).
- 333 20 Smith, A. & Hubley, R. (2008-2015).
- 334 21 Xu, Z. & Wang, H. LTR\_FINDER: an efficient tool for the prediction of full-  
335 length LTR retrotransposons. *Nucleic Acids Res.* **35**, W265-W268,  
336 doi:10.1093/nar/gkm286 (2007).

- 337 22 Bao, W., Kojima, K. K. & Kohany, O. Repbase Update, a database of repetitive  
338 elements in eukaryotic genomes. *Mobile DNA* **6**, 11, doi:10.1186/s13100-015-  
339 0041-9 (2015).
- 340 23 Tarailo-Graovac, M. & Chen, N. Using RepeatMasker to identify repetitive  
341 elements in genomic sequences. *Current protocols in bioinformatics* **25**, 4-10  
342 (2009).
- 343 24 Stanke, M. *et al.* AUGUSTUS: *ab initio* prediction of alternative transcripts.  
344 *Nucleic Acids Research* **34**, W435-W439, doi:10.1093/nar/gkl200 (2006).
- 345 25 Burge, C. & Karlin, S. Prediction of complete gene structures in human genomic  
346 DNA. *Journal of Molecular Biology* **268**, 78-94, doi:10.1006/jmbi.1997.0951  
347 (1997).
- 348 26 Altschul, S. F., Gish, W., Miller, W., Myers, E. W. & Lipman, D. J. Basic local  
349 alignment search tool. *Journal of Molecular Biology* **215**, 403-410,  
350 doi:10.1016/S0022-2836(05)80360-2 (1990).
- 351 27 Birney, E., Clamp, M. & Durbin, R. GeneWise and Genomewise. *Genome*  
352 *Research* **14**, 988-995, doi:10.1101/gr.1865504 (2004).
- 353 28 Bairoch, A. & Apweiler, R. The SWISS-PROT protein sequence database and its  
354 supplement TrEMBL in 2000. *Nucleic Acids Res* **28**, 45-48,  
355 doi:10.1093/nar/28.1.45 (2000).
- 356 29 Hunter, S. *et al.* InterPro: the integrative protein signature database. *Nucleic Acids*  
357 *Res* **37**, D211-215, doi:10.1093/nar/gkn785 (2009).
- 358 30 Harris, M. A. *et al.* The Gene Ontology (GO) database and informatics resource.  
359 *Nucleic Acids Res* **32**, D258-261, doi:10.1093/nar/gkh036 (2004).
- 360 31 Kanehisa, M. & Goto, S. KEGG: kyoto encyclopedia of genes and genomes.  
361 *Nucleic Acids Res* **28**, 27-30, doi:10.1093/nar/28.1.27 (2000).
- 362 32 Fan, Z., Yue, B., Zhang, X., Du, L. & Jian, Z. CpGIScan: an ultrafast tool for  
363 CpG islands identification from genome sequence. *Current Bioinformatics* **12**,  
364 181-184 (2017).
- 365 33 Barazandeh, A., Mohammadabadi, M., Ghaderi-Zefrehei, M. & Nezamabadi-  
366 Pour, H. Genome-wide analysis of CpG islands in some livestock genomes and

- 367 their relationship with genomic features. *Czech Journal of Animal Science* **61**,  
368 487-495 (2016).
- 369 34 Han, L., Su, B., Li, W. H. & Zhao, Z. CpG island density and its correlations with  
370 genomic features in mammalian genomes. *Genome Biology* **9**, R79,  
371 doi:10.1186/gb-2008-9-5-r79 (2008).
- 372 35 Wright, S. I., Agrawal, N. & Bureau, T. E. Effects of recombination rate and gene  
373 density on transposable element distributions in *Arabidopsis thaliana*. *Genome*  
374 *Research* **13**, 1897-1903, doi:10.1101/gr.1281503 (2003).
- 375 36 Li, H. *et al.* TreeFam: a curated database of phylogenetic trees of animal gene  
376 families. *Nucleic Acids Research* **34**, D572-D580, doi:10.1093/nar/gkj118 (2006).
- 377 37 Edgar, R. C. MUSCLE: multiple sequence alignment with high accuracy and high  
378 throughput. *Nucleic Acids Res* **32**, 1792-1797, doi:10.1093/nar/gkh340 (2004).
- 379 38 Guindon, S. *et al.* New algorithms and methods to estimate maximum-likelihood  
380 phylogenies: assessing the performance of PhyML 3.0. *Syst Biol* **59**, 307-321,  
381 doi:10.1093/sysbio/syq010 (2010).
- 382 39 Yang, Z. PAML 4: phylogenetic analysis by maximum likelihood. *Molecular*  
383 *Biology and Evolution* **24**, 1586-1591, doi:10.1093/molbev/msm088 (2007).
- 384 40 Hedges, S. B., Dudley, J. & Kumar, S. TimeTree: a public knowledge-base of  
385 divergence times among organisms. *Bioinformatics* **22**, 2971-2972,  
386 doi:10.1093/bioinformatics/btl505 (2006).
- 387 41 Hahn, M. W., Demuth, J. P. & Han, S. G. Accelerated rate of gene gain and loss  
388 in primates. *Genetics* **177**, 1941-1949, doi:10.1534/genetics.107.080077 (2007).
- 389 42 Simão, F. A., Waterhouse, R. M., Ioannidis, P., Kriventseva, E. V. & Zdobnov, E.  
390 M. BUSCO: assessing genome assembly and annotation completeness with  
391 single-copy orthologs. *Bioinformatics* **31**, 3210-3212 (2015).
- 392

393 **Tables and figures**

394 **Table 1 Sequencing results for African pike genome assembly.**

| Libraries | Raw data    |                  | High-quality data |                  |
|-----------|-------------|------------------|-------------------|------------------|
|           | Total bases | Sequencing depth | Total bases       | Sequencing depth |
|           | (Gb)        | ( $\times$ )     | (Gb)              | ( $\times$ )     |
| stLFR     | 118.6       | 141.2            | 60.38             | 71.88            |
| Nanopore  | NA          | NA               | 11.02             | 13.12            |
| Hi-C      | 66.86       | 77.47            | 65.82             | 76.25            |

395

396

397 **Table 2 K-mer analysis for African pike genome.**

| K  | K-mer Number   | K-mer Depth | Genome Size (bp) | Used Bases     | Used Reads  |
|----|----------------|-------------|------------------|----------------|-------------|
| 17 | 47,775,728,489 | 48          | 995,327,676      | 57,662,825,000 | 576,628,250 |

398

399

400 **Table 3 Assembly statistics for the African pike.**

|                     | stLFR       |             | stLFR+ Nanopore |             | stLFR+ Nanopore+ HiC |             |
|---------------------|-------------|-------------|-----------------|-------------|----------------------|-------------|
|                     | Contig      | Scaffold    | Contig          | Scaffold    | Contig               | Scaffold    |
| Number              | 52,742      | 26,897      | 31,798          | 26,897      | 31,612               | 25,653      |
| Length (bp)         | 793,428,541 | 859,230,819 | 848,265,930     | 864,075,354 | 846,590,441          | 862,056,730 |
| Maximum length (bp) | 520,087     | 20,559,849  | 2,339,471       | 20,475,446  | 2,339,471            | 34,852,849  |
| Average length (bp) | 15,043      | 31,945      | 26,676          | 32,125      | 26,250               | 32,805      |
| N50                 | 43,947      | 5,131,134   | 352,135         | 5,146,741   | 347,381              | 25,843,955  |
| N90                 | 6,949       | 9,946       | 9,400           | 10,077      | 9,250                | 9,853       |
| N rate (%)          | 0.00        | 7.65        | 0.00            | 1.82        | 0.00                 | 1.79        |
| GC content (%)      | 41.30       | 41.30       | 41.37           | 41.37       | 41.37                | 41.37       |

401

402

403

404

405



406 **Table 4 Summary of the assembled 29 chromosomes in the African pike.**

| Chromosome | Number of contigs | Length of contigs(bp) |
|------------|-------------------|-----------------------|
| 1          | 174               | 34,852,849            |
| 2          | 155               | 33,370,094            |
| 3          | 191               | 32,320,846            |
| 4          | 163               | 31,998,173            |
| 5          | 169               | 31,241,732            |
| 6          | 150               | 30,610,121            |
| 7          | 231               | 30,524,172            |
| 8          | 175               | 29,799,086            |
| 9          | 132               | 29,196,192            |
| 10         | 157               | 29,175,684            |
| 11         | 145               | 27,911,487            |
| 12         | 133               | 27,279,904            |
| 13         | 104               | 26,912,730            |
| 14         | 144               | 26,647,357            |
| 15         | 118               | 25,843,488            |
| 16         | 137               | 25,843,955            |
| 17         | 130               | 25,569,178            |
| 18         | 131               | 25,245,420            |
| 19         | 122               | 24,922,465            |
| 20         | 153               | 24,594,709            |
| 21         | 216               | 23,062,401            |
| 22         | 116               | 22,653,434            |
| 23         | 166               | 22,465,777            |
| 24         | 82                | 21,478,618            |
| 25         | 168               | 21,151,346            |
| 26         | 121               | 19,748,208            |
| 27         | 135               | 18,283,571            |
| 28         | 48                | 11,790,282            |
| 29         | 76                | 8,027,360             |
| Total      | 4,142             | 742,520,639 (86.1%)   |

407

408 **Table 5 Prediction of repetitive sequences in African pike.**

| Type              | Repeat Size (bp) | % of genome |
|-------------------|------------------|-------------|
| TRF               | 42,227,324       | 4.89        |
| RepeatMasker      | 140,715,741      | 16.30       |
| RepeatProteinMask | 36,712,306       | 4.25        |
| <i>De novo</i>    | 292,061,790      | 33.81       |
| Total             | 317,311,789      | 36.73       |

409 **Table 6 Repeat annotation of the African pike assembly.**

| Type    | RepBase TEs |             | TE Proteins |             | <i>De novo</i> |             | Combined TEs |             |
|---------|-------------|-------------|-------------|-------------|----------------|-------------|--------------|-------------|
|         | Length (bp) | % in genome | Length (bp) | % in genome | Length (bp)    | % in genome | Length (bp)  | % in genome |
| DNA     | 64,714,586  | 7.49        | 2,115,720   | 0.25        | 106,985,346    | 12.39       | 140,841,144  | 16.30       |
| LINE    | 49,378,300  | 5.72        | 31,164,294  | 3.61        | 134,752,407    | 15.6        | 153,325,343  | 17.75       |
| SINE    | 25,662,188  | 2.80        | 0.00        | 0.00        | 10,933,947     | 1.27        | 34,624,631   | 4.00        |
| LTR     | 15,943,766  | 1.85        | 3,844,230   | 0.45        | 67,207,893     | 7.78        | 77,013,770   | 8.92        |
| Other   | 17,549      | 0.002       | 0.00        | 0.00        | 0.00           | 0.00        | 17,549       | 0.002       |
| Unknown | 0.00        | 0.00        | 0.00        | 0.00        | 3,180,101      | 0.37        | 3,180,101    | 0.37        |
| Total   | 140,715,741 | 16.30       | 36,712,306  | 4.25        | 268,746,546    | 31.12       | 284,106,647  | 32.89       |

410

411 **Table 7 Statistics of gene annotations in African pike assembly.**

| Gene set       |                    | Number | Average transcript length (bp) | Average CDS length (bp) | Average exon per gene | Average exon length (bp) | Average intron length (bp) |
|----------------|--------------------|--------|--------------------------------|-------------------------|-----------------------|--------------------------|----------------------------|
| <i>De novo</i> | Augustus           | 23,163 | 14,343                         | 1,392                   | 7.95                  | 175                      | 1,862                      |
|                | Genscan            | 29,084 | 18,389                         | 1,461                   | 8.06                  | 181                      | 2,398                      |
| Homolog        | <i>I.punctatus</i> | 45,520 | 27,590                         | 2,021                   | 11.57                 | 175                      | 2,418                      |
|                | <i>D.rerio</i>     | 26,485 | 15,268                         | 25,114                  | 8.68                  | 185                      | 3,060                      |
|                | <i>P.nattereri</i> | 45,066 | 29,558                         | 1,968                   | 11.22                 | 175                      | 2,699                      |
|                | <i>P.hyp</i>       | 37,334 | 29,021                         | 2,084                   | 11.95                 | 175                      | 2,461                      |
|                | <i>A.mexicanus</i> | 41,543 | 32,069                         | 1,991                   | 11.54                 | 173                      | 2,855                      |
|                | <i>C.carpio</i>    | 55,544 | 13,199                         | 1,176                   | 6.72                  | 175                      | 2,100                      |
| Combined       | GLEAN              | 24,314 | 15,835                         | 1,712                   | 9.77                  | 175                      | 1,610                      |

412

413 **Table 8 Functional annotations of predicted genes in African pike assembly.**

|             | Database  | Number | Percentage (%) |
|-------------|-----------|--------|----------------|
| Total       |           | 24,314 | 100            |
|             | InterPro  | 23,989 | 96.35          |
|             | GO        | 17,227 | 70.85          |
|             | KEGG      | 21,824 | 89.76          |
|             | Swissprot | 23,012 | 94.65          |
|             | TrEMBL    | 22,970 | 94.47          |
| unannotated |           | 315    | 1.30           |

414

415 **Table 9 Statistics of the BUSCO assessment.**

| Types of BUSCOs             | Gene Set                     |                       |                          | Assembly                     |                       |                          |
|-----------------------------|------------------------------|-----------------------|--------------------------|------------------------------|-----------------------|--------------------------|
|                             | Number of actinopterygii (%) | Number of metazoa (%) | Number of vertebrata (%) | Number of actinopterygii (%) | Number of metazoa (%) | Number of vertebrata (%) |
| Complete BUSCOs             | 4,241 (92.5%)                | 943 (96.4%)           | 2,433 (94.1%)            | 4,160 (90.7%)                | 901 (92.1%)           | 2,531 (90.6%)            |
| Fragmented BUSCOs           | 222 (4.8%)                   | 26 (2.7%)             | 110 (4.3%)               | 252 (5.5%)                   | 14 (1.4%)             | 169 (6.5%)               |
| Missing BUSCOs              | 121 (2.7%)                   | 9 (0.9%)              | 43 (1.6%)                | 173 (3.8%)                   | 63 (6.5%)             | 66 (2.6%)                |
| Total BUSCO groups searched | 4,584 (100%)                 | 978 (100%)            | 2,586 (100%)             | 4,584 (100%)                 | 978 (100%)            | 2,586 (100%)             |

416

## 417 **Figures**

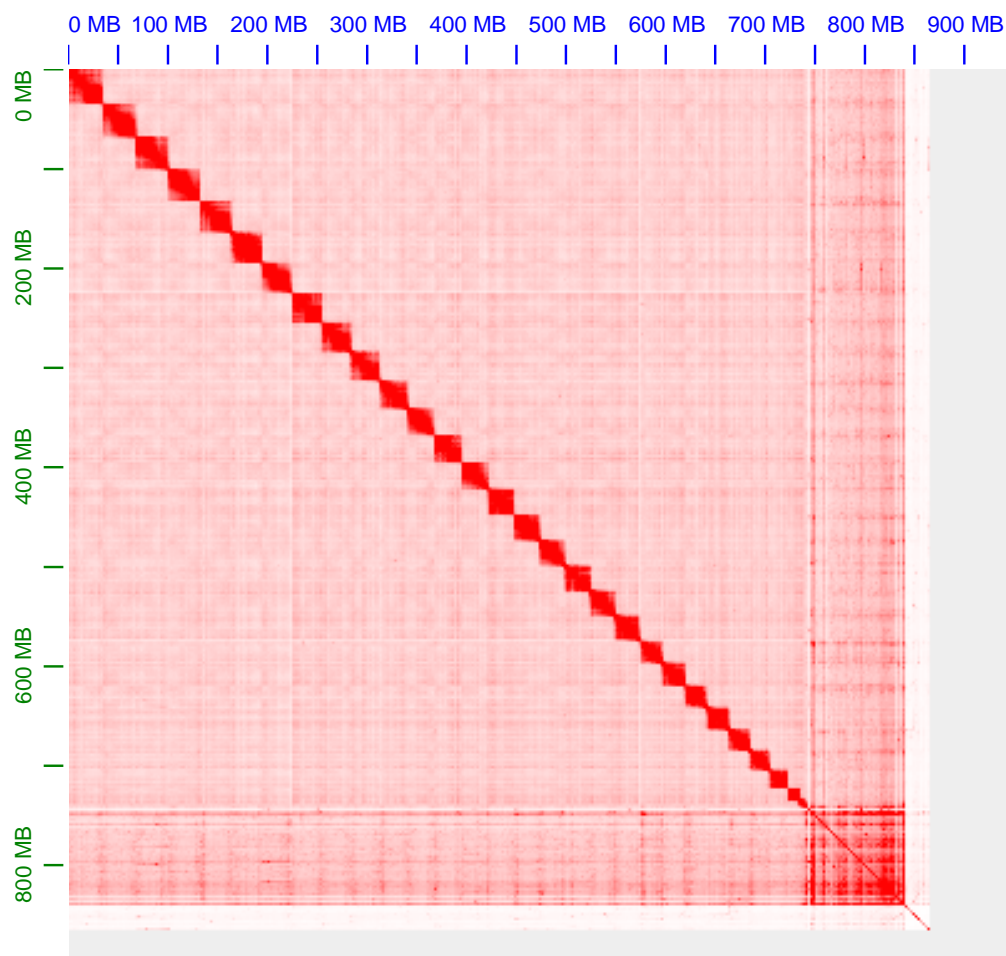

418

419 **Fig. 1** Hi-C chromosome heat map of African pike genome. Each block represents a Hi-C

420 contact between two genomic loci within a 100kb bin. Darker color represents higher

421 contact intensity.

422

423 a

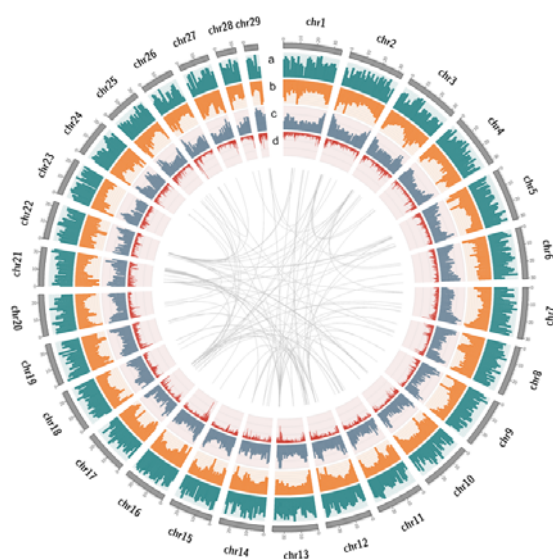

b

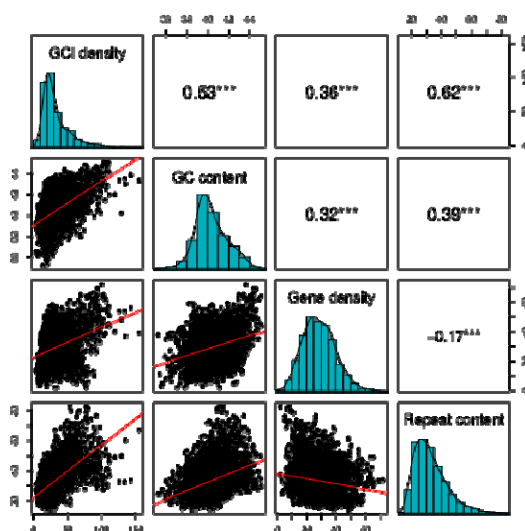

424

425 **Fig. 2** Genome features of the African pike. (a) The circos plot of 29 chromosomes in  
 426 African pike. The tracks from outside to inside are: (1) Gene density, defined as gene  
 427 counts per million base pairs. (2) Repeat content, defined as the proportion of repetitive  
 428 elements within 1-Mb windows. It was presented in ratio as divided by the highest value.  
 429 The axis ranges from 0 to 1. (3) GC content, quantified by the proportion of GC in  
 430 unambiguous bases in 1-Mb window. It was presented in ratio as divided by the highest  
 431 value. The axis ranges from 0 to 1. (4) CGI content, defined as CGI counts per million  
 432 base pairs. The axis ranges from 0 to 200. (b) Correlation matrix among four genome  
 433 features. The diagonal presents the distributions by histogram for corresponding genome  
 434 features. The lower triangular matrix presents the bivariate scatter plots with a fitted  
 435 linear model for each pair of genome features. The upper triangular matrix displays the  
 436 Pearson correlation results plus significance level for the corresponding genome features.  
 437 Different asterisks represent different significance levels:  $p$ -values 0.001 (\*\*\*), 0.01 (\*\*),  
 438 0.05 (\*).

439

440 a

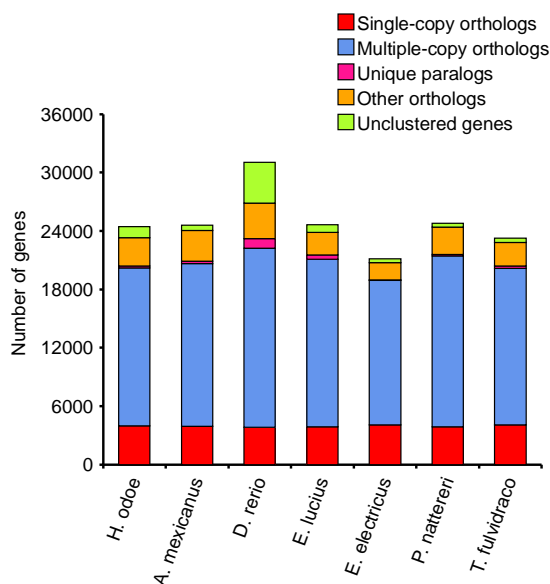

b

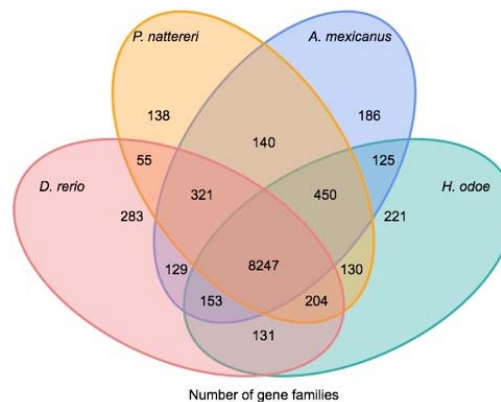

441

442 **Fig. 3** Comparative genome analysis. (a) Orthologue clustering analysis for African pike

443 and other species. The x-axis displays the seven species and the y-axis presents the gene

444 counts. Red refers to single-copy orthologs, blue refers to multiple-copy orthologs, pink

445 refers to unique orthologs for corresponding species, orange stands for other orthologs,

446 and green represents unclustered genes. (b) Venn diagram. Shared and unique gene

447 families among the four species were shown in numbers in corresponding regions.

448

449 a

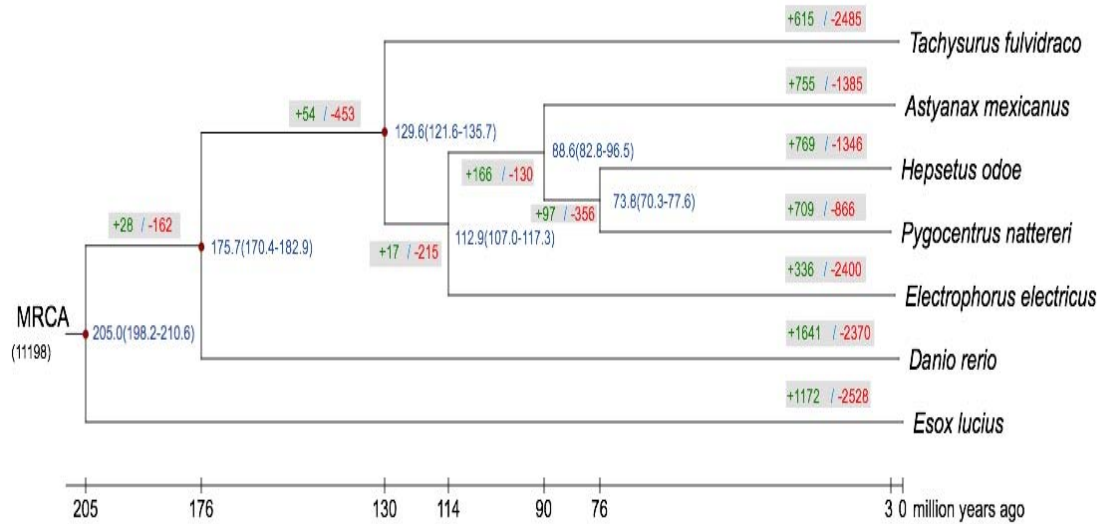

450

451

b

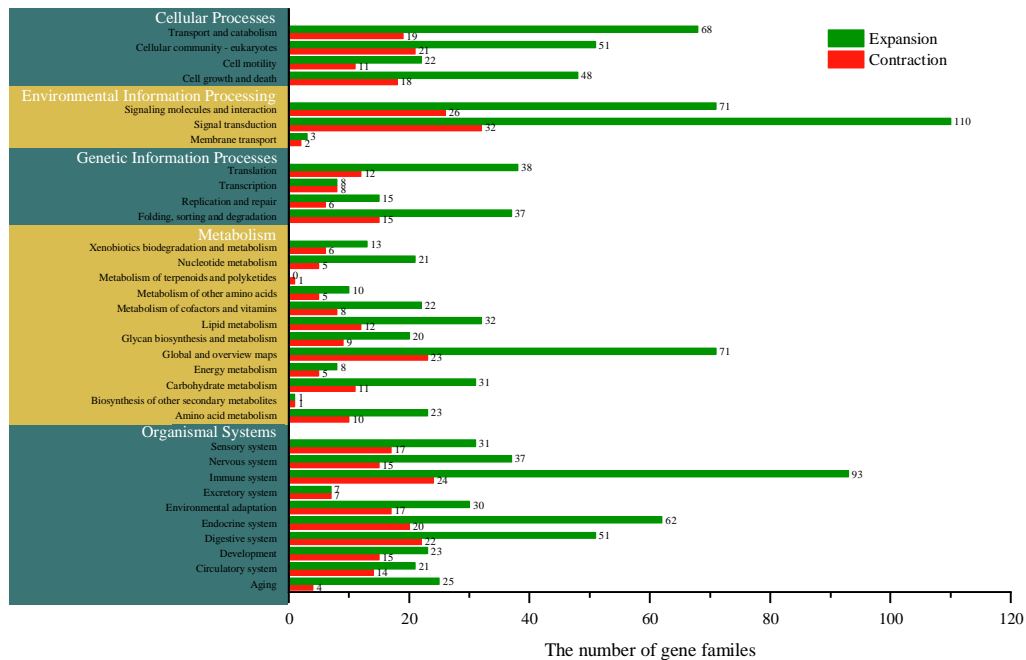

452

453

454

455

456

457

458

459

**Fig. 4** Phylogenetic tree, divergence time estimations, and the gene family expansions and contractions for African pike and other species from different fish orders. (a) The phylogenetic tree. Blue values represent the divergence time. Red nodes in the phylogenetic tree represent the reference divergence times. Green and red values represent expanded and contracted gene families for corresponding lineages, respectively. (b) KEGG functional enrichment of the significantly expanded and contracted gene families in the African pike.



460 **Supplementary materials**

461 **Additional file 1: Supplementary figures and tables.**

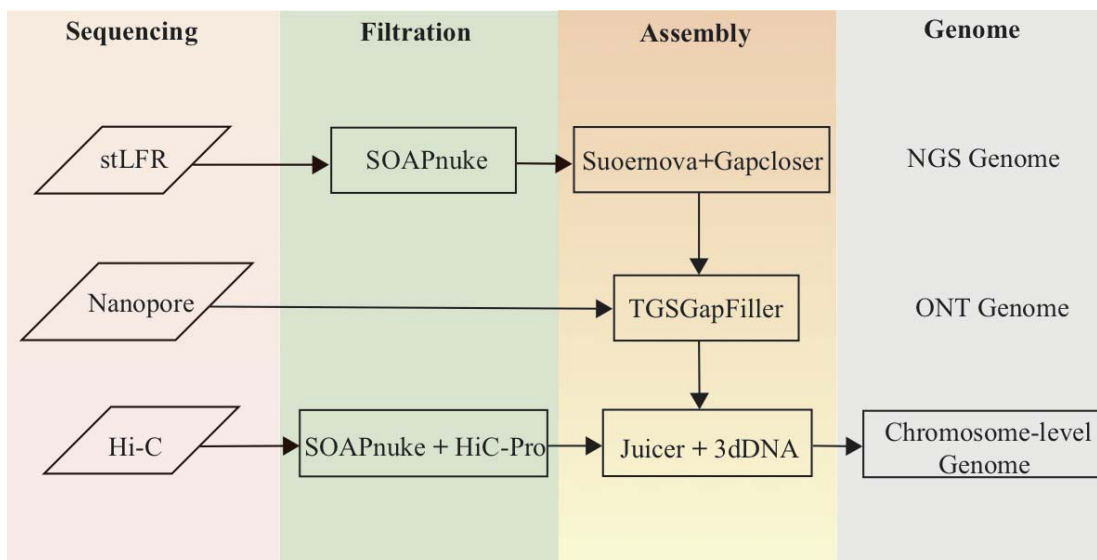

462

463 **Fig. S1** The assembly workflow.

464

465

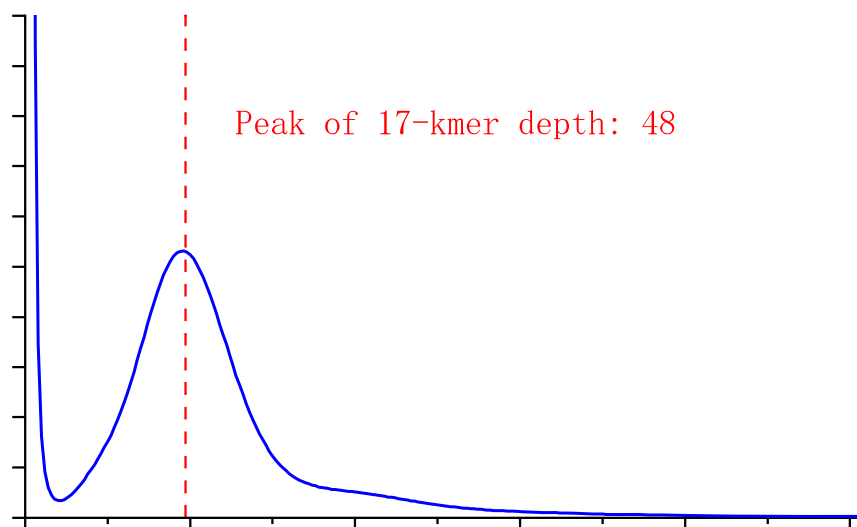

466

467 **Fig. S2** Distribution of k-mer frequency.

468

469

470 **Table S1 Statistics of gene family clustering.**

| Species              | Genes number | Genes in families | Unclustered genes | Family number | Unique families | Average genes per family |
|----------------------|--------------|-------------------|-------------------|---------------|-----------------|--------------------------|
| <i>H.odoe</i>        | 24,314       | 23,300            | 1,014             | 9,661         | 103             | 2.47                     |
| <i>A.mexicanus</i>   | 24,612       | 24,043            | 569               | 9,751         | 73              | 2.82                     |
| <i>D.rerio</i>       | 31,056       | 26,849            | 4,207             | 9,523         | 155             | 2.82                     |
| <i>E. lucius</i>     | 24,657       | 23,851            | 806               | 9,358         | 119             | 2.55                     |
| <i>E. electricus</i> | 21,162       | 20,761            | 401               | 9,243         | 18              | 2.25                     |
| <i>P. nattereri</i>  | 24,796       | 24,380            | 416               | 9,685         | 57              | 2.52                     |
| <i>T. fulvidraco</i> | 23,258       | 22,796            | 462               | 9,389         | 78              | 2.43                     |

471

472 **Table S2 Gene family expansion and contraction statistics in African pike genome.**

|             | Family number | Family number (p <0.05) | Genes Number | KEGG Number |
|-------------|---------------|-------------------------|--------------|-------------|
| Expansion   | 769           | 284                     | 1,548        | 1,384       |
| Contraction | 1,364         | 81                      | 707          | 627         |

473
